# Supplementary material for: Plasmid Flux in Escherichia coli ST131 Sublineages, Analyzed by Plasmid Constellation Network (PLACNET), a New Method for Plasmid Reconstruction from Whole Genome Sequences
Source: PubMed Central journal article supplement (PMC4270462; doi:10.1371/journal.pgen.1004766), 2014-12-18

Figure S6

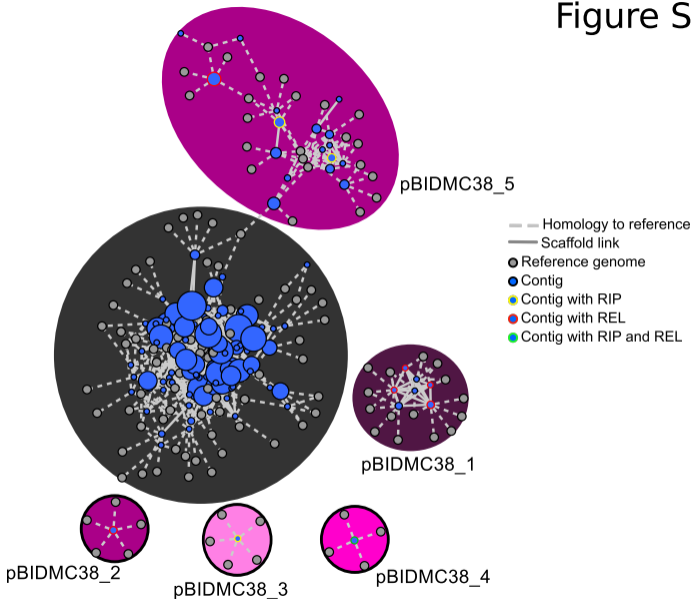

Supplement: pgen.1004766.s006.pdf [file pgen.1004766.s006.pdf]
