# Supplementary material for: Plasmid Flux in Escherichia coli ST131 Sublineages, Analyzed by Plasmid Constellation Network (PLACNET), a New Method for Plasmid Reconstruction from Whole Genome Sequences
Source: PubMed Central journal article supplement (PMC4270462; doi:10.1371/journal.pgen.1004766), 2014-12-18
Supplement: pgen.1004766.s011.pdf [file pgen.1004766.s011.pdf]

# Figure S11B

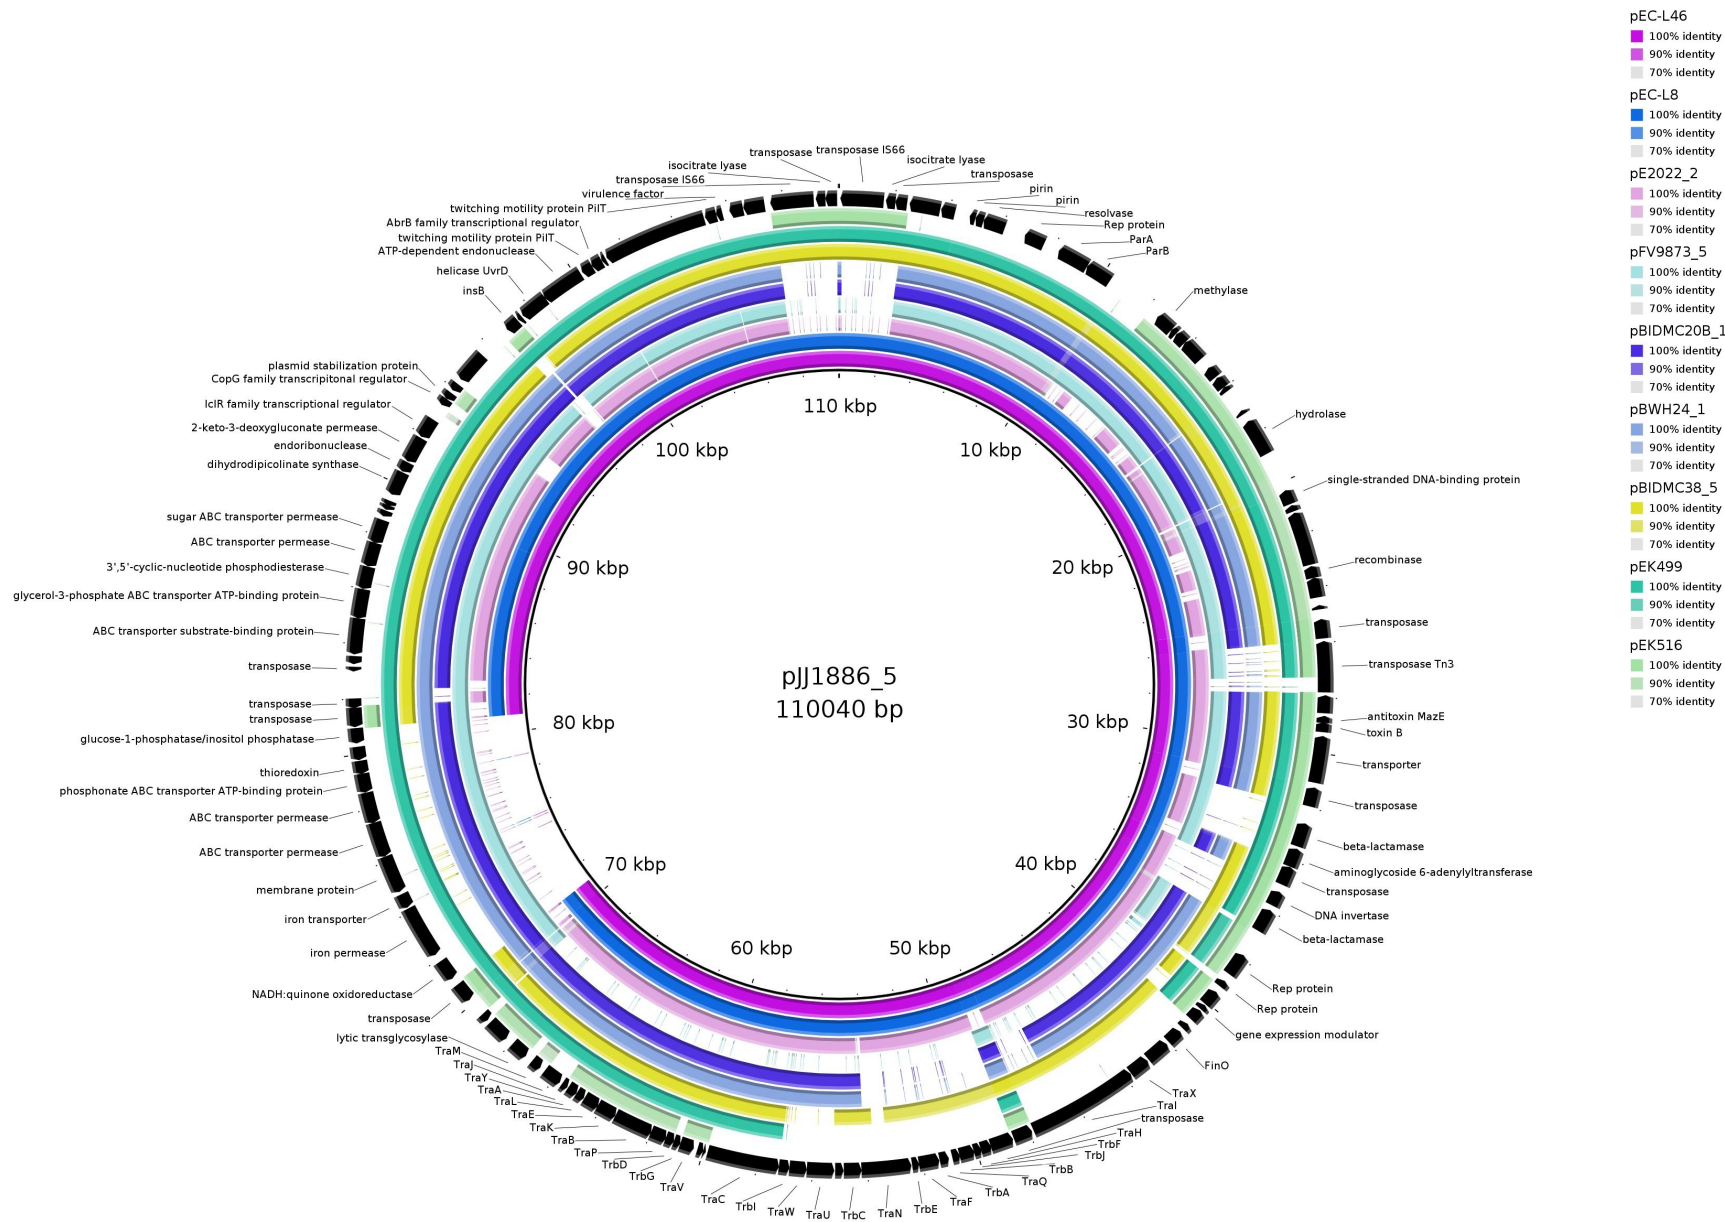

Figure S11C

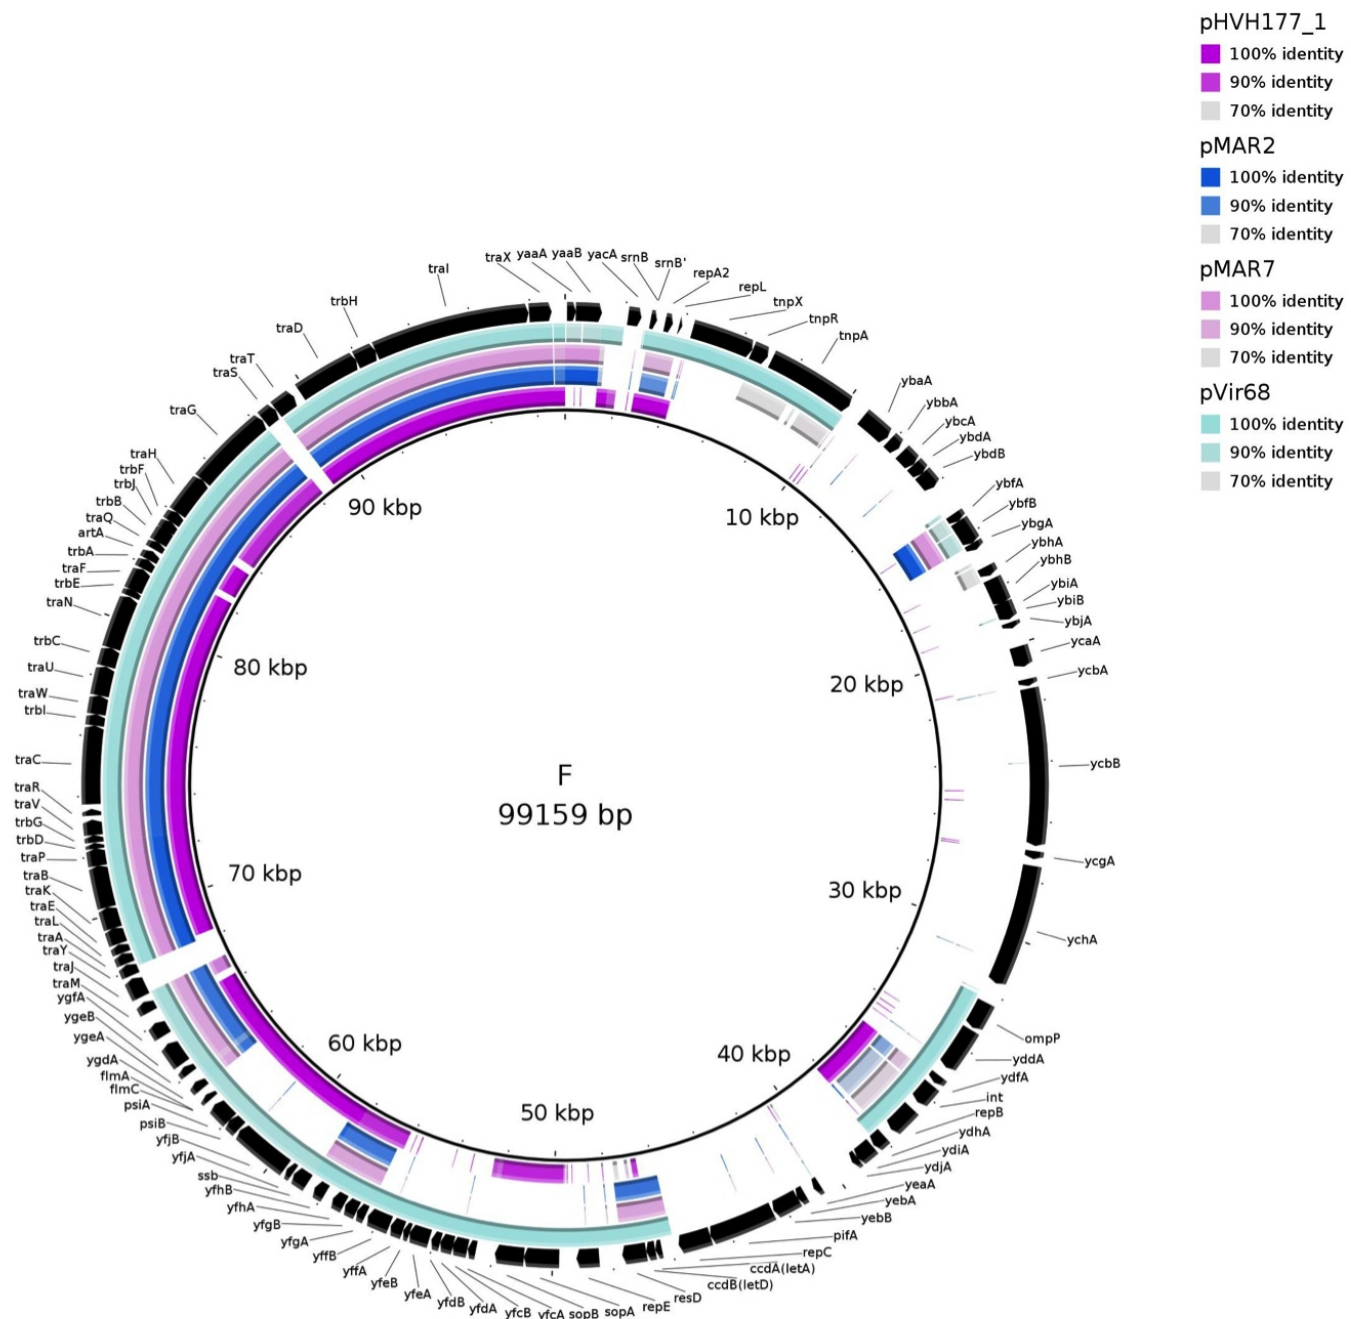



Figure S11D

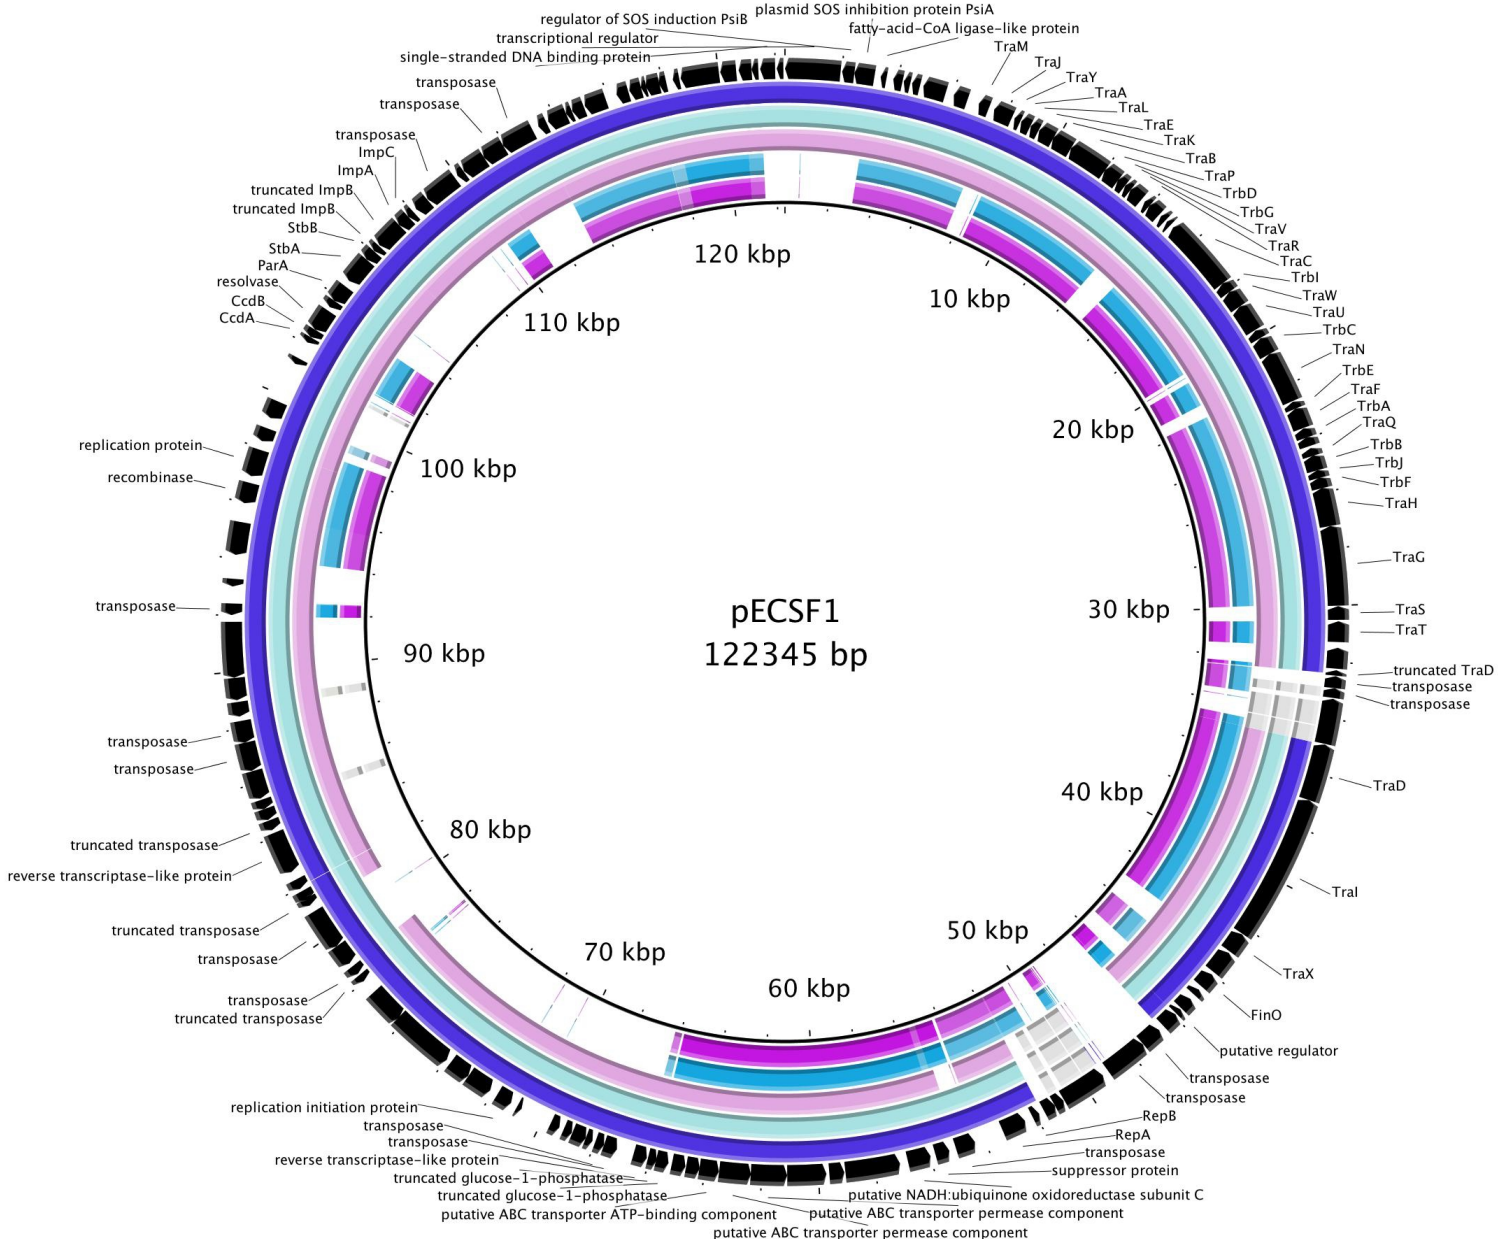

- pIP1206**
  - 100% identity
  - 90% identity
  - 70% identity
- pKF3-140**
  - 100% identity
  - 90% identity
  - 70% identity
- pIESCUM**
  - 100% identity
  - 90% identity
  - 70% identity
- pUM146**
  - 100% identity
  - 90% identity
  - 70% identity
- pEC14\_114**
  - 100% identity
  - 90% identity
  - 70% identity

pECSF1  
122345 bp

regulator of SOS induction PsiB plasmid SOS inhibition protein PsiA fatty-acid-CoA ligase-like protein TraM TraJ TraY TraA TraL TraE TraK TraB TraP TraD TrbG TrbV TraR TraC TrbI TraW TraU TrbC TraN TrbE TraF TrbA TraQ TrbB TrbJ TrbF TraH TraG TraS TraT truncated TraD transposase transposase TraD TraJ TraX TraX FinO putative regulator transposase transposase RepB RepA transposase suppressor protein putative NADH:ubiquinone oxidoreductase subunit C putative ABC transporter permease component putative ABC transporter permease component

transcriptional regulator single-stranded DNA binding protein transposase transposase ImpC ImpA truncated ImpB truncated ImpB StbB StbA ParA resolvase CcdB CcdA

replication protein recombinase transposase transposase truncated transposase reverse transcriptase-like protein truncated transposase transposase transposase truncated transposase replication initiation protein transposase transposase reverse transcriptase-like protein truncated glucose-1-phosphatase truncated glucose-1-phosphatase putative ABC transporter ATP-binding component
