# Supplementary material for: Plasmid Flux in Escherichia coli ST131 Sublineages, Analyzed by Plasmid Constellation Network (PLACNET), a New Method for Plasmid Reconstruction from Whole Genome Sequences
Source: PubMed Central journal article supplement (PMC4270462; doi:10.1371/journal.pgen.1004766), 2014-12-18

Figure S18A

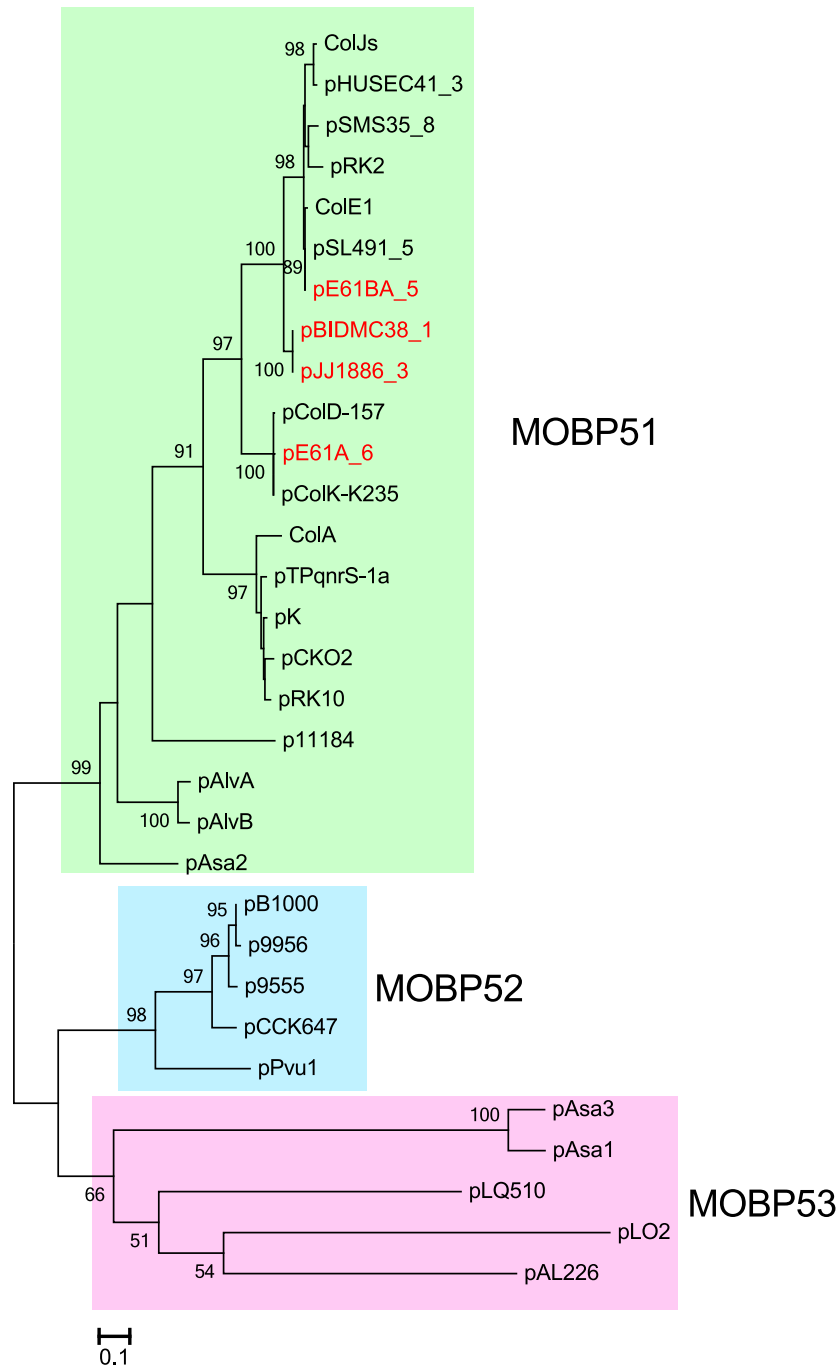

# Figure S18B

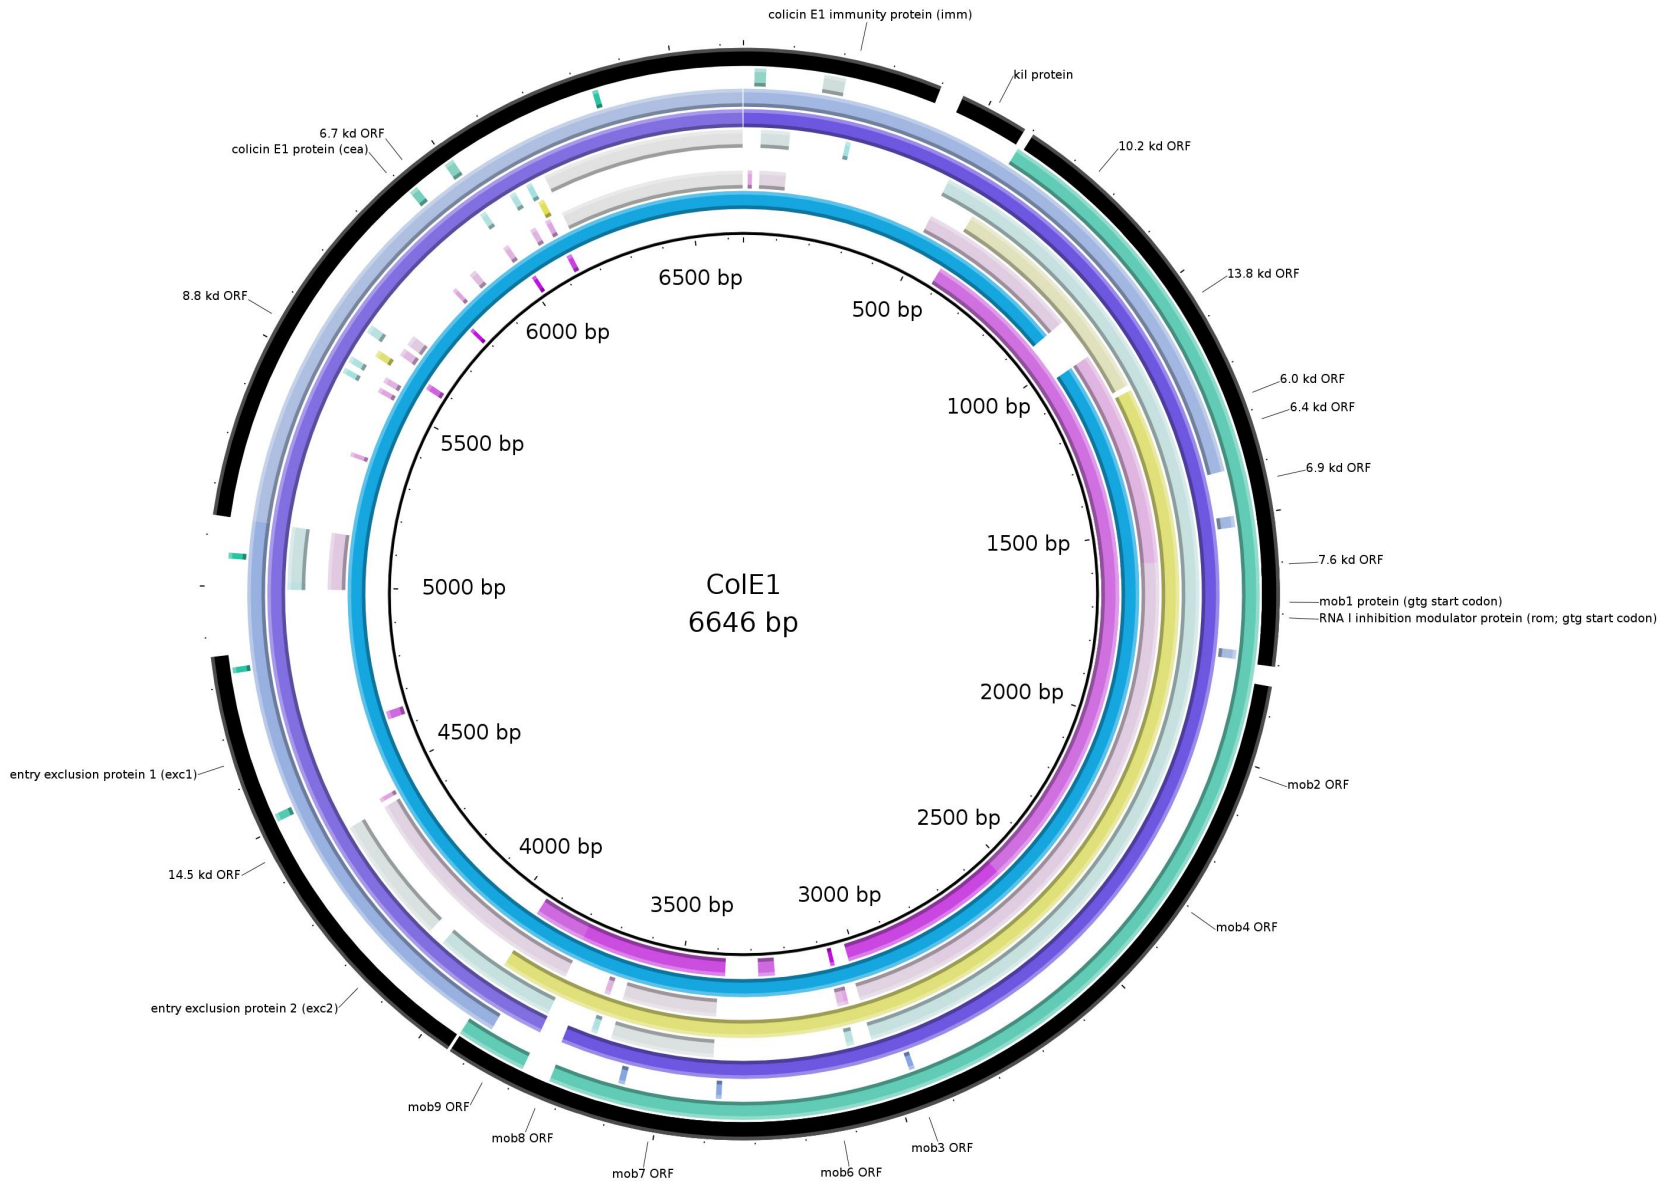

Figure S18C

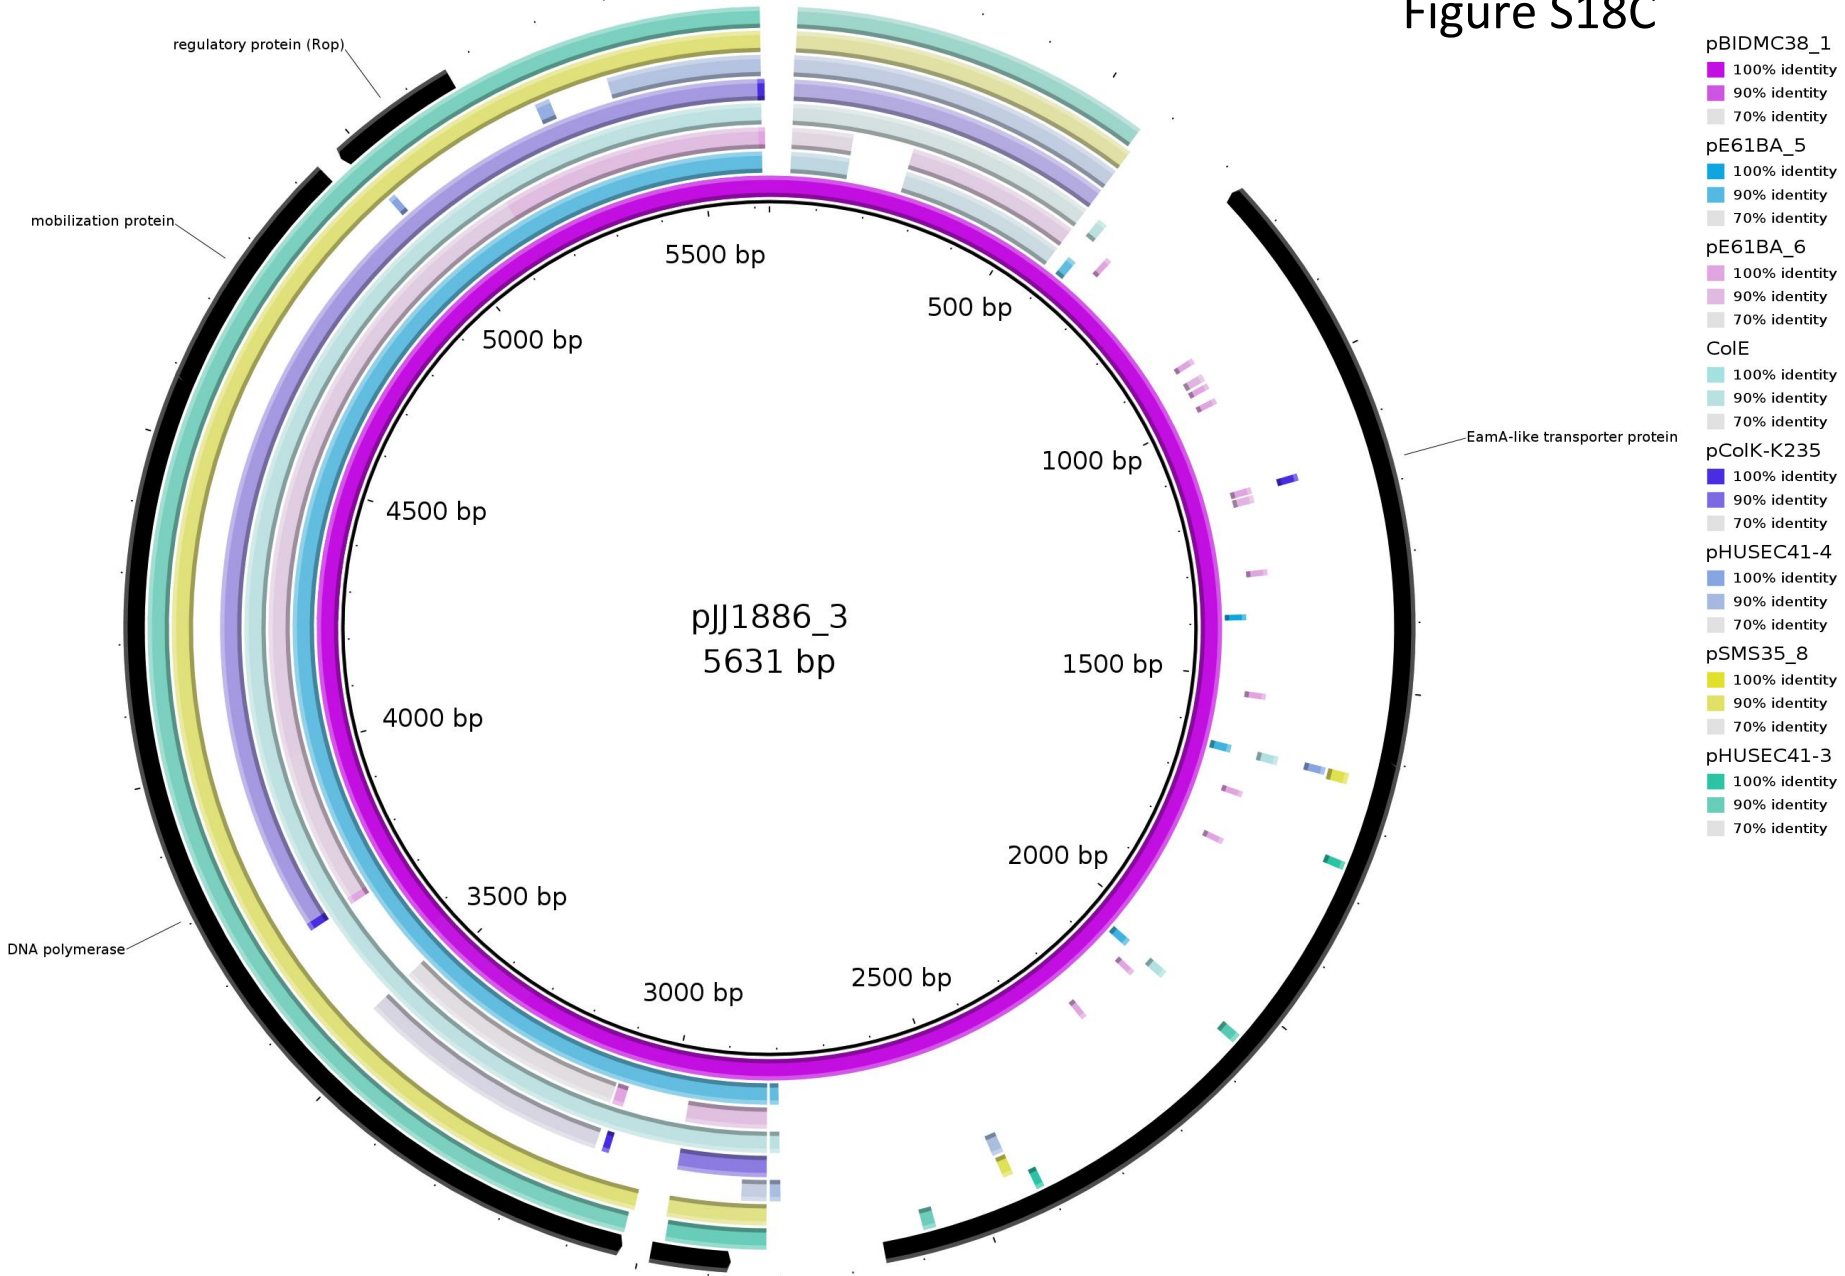

Figure S18D

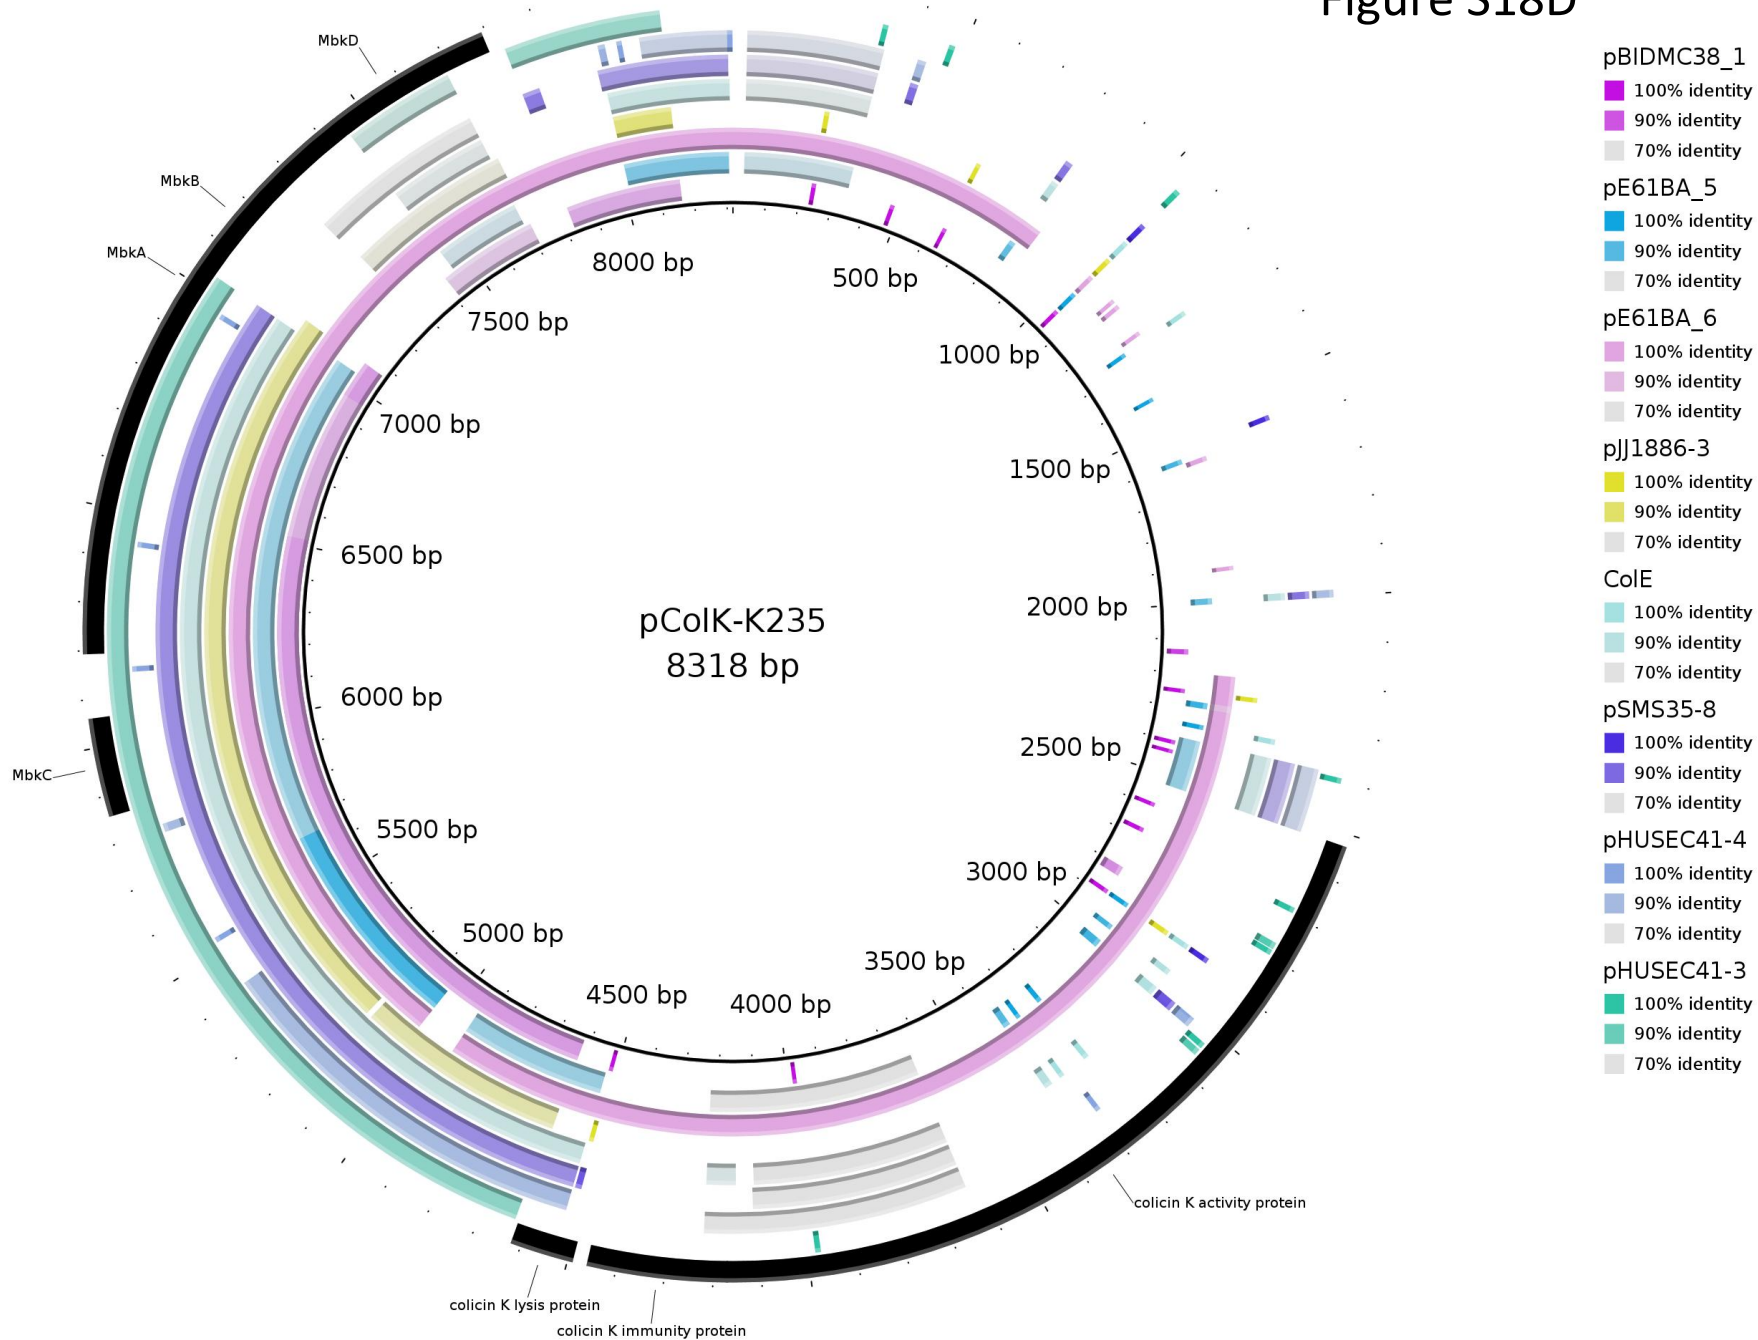

Supplement: pgen.1004766.s018.pdf [file pgen.1004766.s018.pdf]
