# Supplementary material for: Plasmid Flux in Escherichia coli ST131 Sublineages, Analyzed by Plasmid Constellation Network (PLACNET), a New Method for Plasmid Reconstruction from Whole Genome Sequences
Source: PubMed Central journal article supplement (PMC4270462; doi:10.1371/journal.pgen.1004766), 2014-12-18
Supplement: pgen.1004766.s023.pdf [file pgen.1004766.s023.pdf]

Figure S23

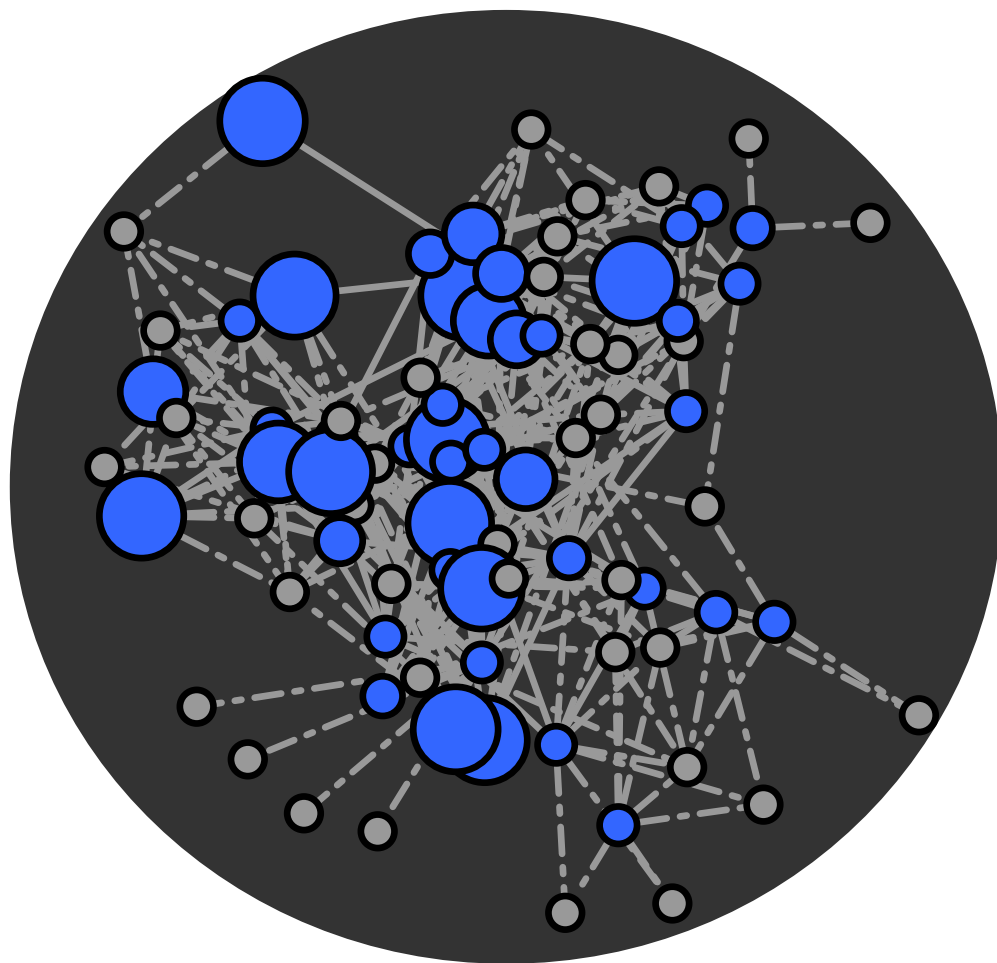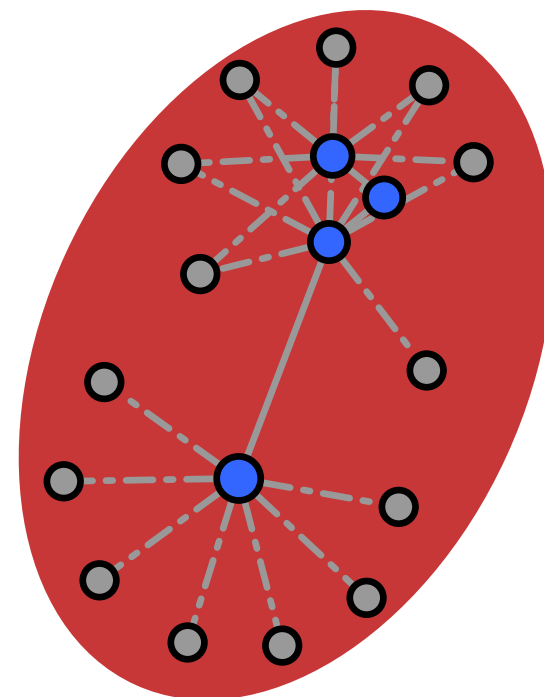

- — Homology to reference
- Scaffold link
- Reference genome
- Contig
- Contig with RIP
- Contig with REL
- Contig with RIP and REL
