# Supplementary material for: Plasmid Flux in Escherichia coli ST131 Sublineages, Analyzed by Plasmid Constellation Network (PLACNET), a New Method for Plasmid Reconstruction from Whole Genome Sequences
Source: PubMed Central journal article supplement (PMC4270462; doi:10.1371/journal.pgen.1004766), 2014-12-18
Supplement: pgen.1004766.s025.pdf [file pgen.1004766.s025.pdf]

STEP 1: 19 nodes 157-200 bp deleted

Original network

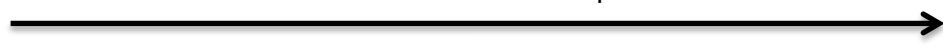

Pruned network

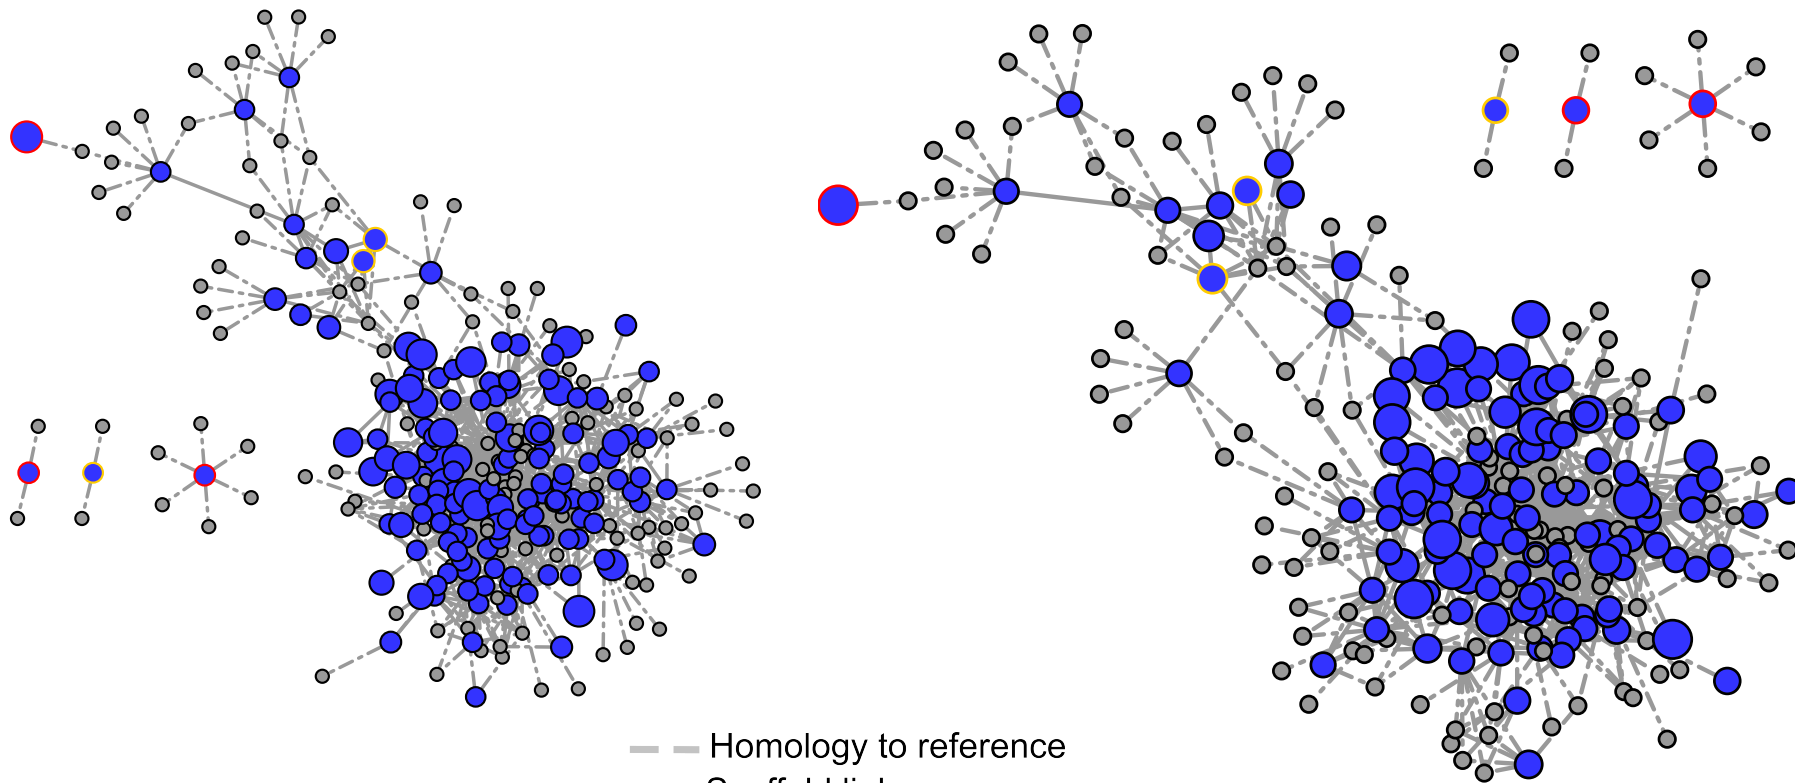

- - Homology to reference

— Scaffold link

● Reference genome

● Contig

● Contig with RIP

● Contig with REL

● Contig with RIP and REL
