# Supplementary material for: Plasmid Flux in Escherichia coli ST131 Sublineages, Analyzed by Plasmid Constellation Network (PLACNET), a New Method for Plasmid Reconstruction from Whole Genome Sequences
Source: PubMed Central journal article supplement (PMC4270462; doi:10.1371/journal.pgen.1004766), 2014-12-18

Figure S26

- Homology to reference
- Scaffold link
- Reference genome
- Contig
- Contig with RIP
- Contig with REL
- Contig with RIP and REL

STEP 2: Initial plasmid analysis

| Node (chr. 17x aprox.)               | Blastn/Blastx                                                                             | Copy number (cov. based) | Decision |
|--------------------------------------|-------------------------------------------------------------------------------------------|--------------------------|----------|
| NODE_215_length_1552_cov_360.108551  | RepA                                                                                      | 21                       | p1       |
| NODE_216_length_5167_cov_176.524261  | RepA , Mobilization protein (MOBQ12)                                                      | 10                       | p2       |
| NODE_218_length_55955_cov_105.076561 | Conjugal transfer proteins (TraI: MOB P11), plasmid stabilization proteins (parAB), RepA. | 6                        | p4       |
| NODE_217_length_5601_cov_175.993118  | RepA, Mobilization protein (MOBP5)                                                        | 10                       | p3       |

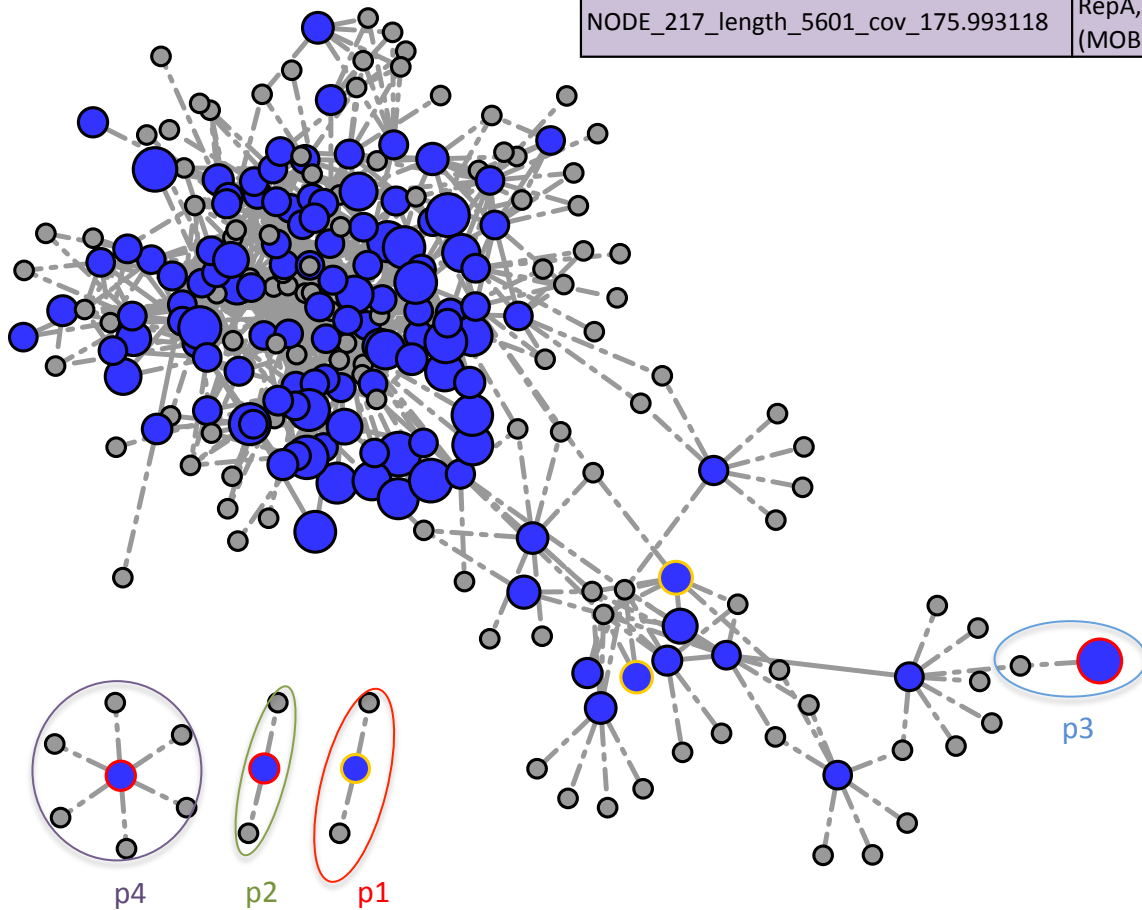

Supplement: pgen.1004766.s026.pdf [file pgen.1004766.s026.pdf]
