# Supplementary material for: Plasmid Flux in Escherichia coli ST131 Sublineages, Analyzed by Plasmid Constellation Network (PLACNET), a New Method for Plasmid Reconstruction from Whole Genome Sequences
Source: PubMed Central journal article supplement (PMC4270462; doi:10.1371/journal.pgen.1004766), 2014-12-18

Figure S27

STEP 3: Analysis of IncF plasmid

| Node (chr. 17x aprox.)             | Blastn/Blastx           | Copy number (cov. based) | Decision |
|------------------------------------|-------------------------|--------------------------|----------|
| NODE_120_length_214_cov_65.43      | transposase OrfB, IS911 | 4                        | Hub*     |
| NODE_25_length_2532_cov_138.993881 | transposase, IS66       | 8                        | Hub*     |
| NODE_104_length_209_cov_37.35      | transposase OrfB, IS911 | 2                        | Hub*     |
| NODE_169_length_309_cov_35.922077  | transposase, IS629      | 2                        | Hub*     |

- Homology to reference
- Scaffold link
- Reference genome
- Contig
- Contig with RIP
- Contig with REL
- Contig with RIP and REL

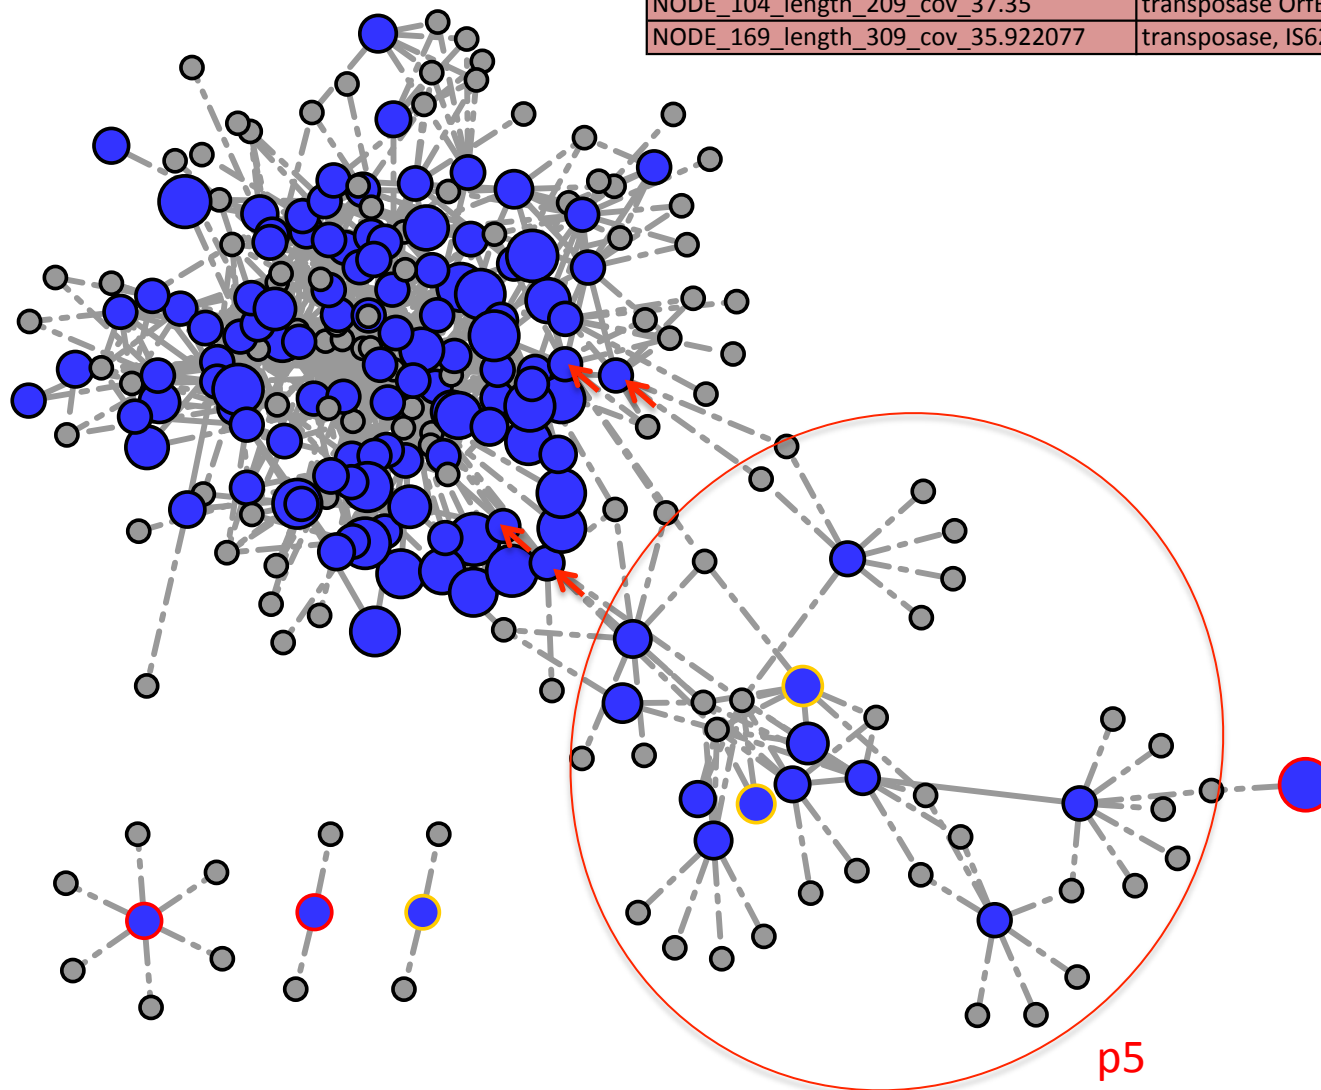

Supplement: pgen.1004766.s027.pdf [file pgen.1004766.s027.pdf]
