# Supplementary material for: Plasmid Flux in Escherichia coli ST131 Sublineages, Analyzed by Plasmid Constellation Network (PLACNET), a New Method for Plasmid Reconstruction from Whole Genome Sequences
Source: PubMed Central journal article supplement (PMC4270462; doi:10.1371/journal.pgen.1004766), 2014-12-18

Plasmid 5 (p5) : 104,426 bp

Reference plasmid pJJ1886\_5 : 110,040 bp

Delta-size (% error): 5,614 bp (5 %)

MOB<sub>F12</sub>, IncF plasmid

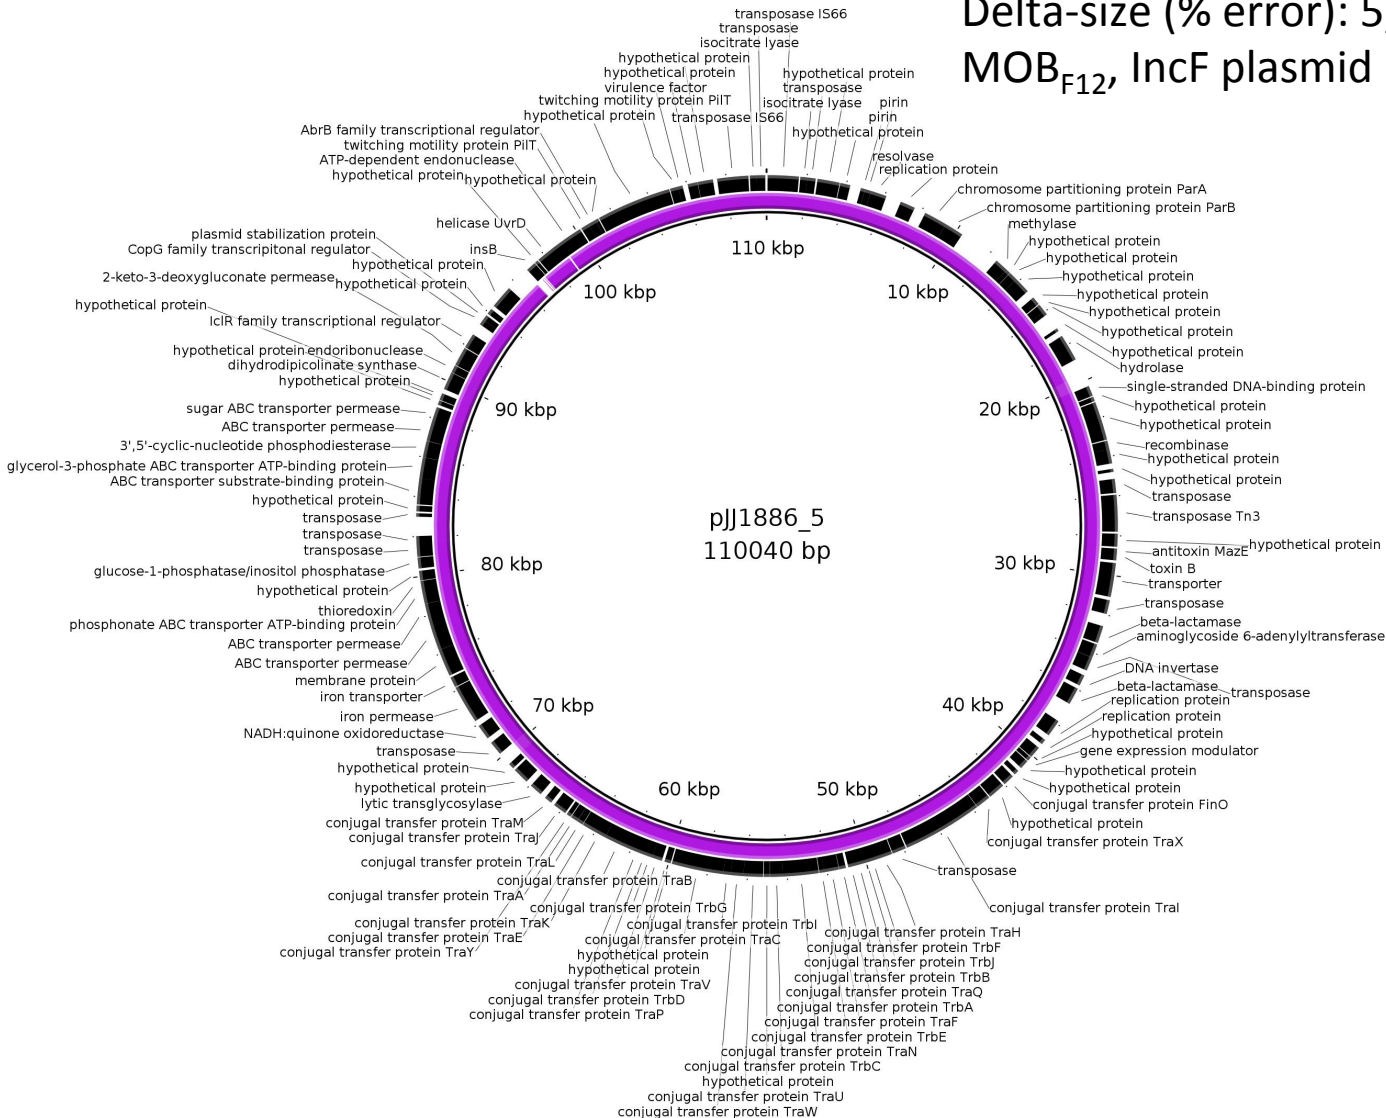

Supplement: pgen.1004766.s028.pdf [file pgen.1004766.s028.pdf]
