# Supplementary material for: Plasmid Flux in Escherichia coli ST131 Sublineages, Analyzed by Plasmid Constellation Network (PLACNET), a New Method for Plasmid Reconstruction from Whole Genome Sequences
Source: PubMed Central journal article supplement (PMC4270462; doi:10.1371/journal.pgen.1004766), 2014-12-18

## STEP 2: Initial plasmid and hub analysis

| Node (chr. 17x aprox.)             | Blastn/Blastx                                         | Copy number (cov. based) | Decision |
|------------------------------------|-------------------------------------------------------|--------------------------|----------|
| NODE_18_length_88778_cov_17.254745 | putative DNA helicase, conserved hypothetical protein | 1                        | Chr      |
| NODE_39_length_339_cov_36.088123   | transposase IS1                                       | 2                        | Chr      |
| NODE_23_length_708_cov_35.866665   | MATE family multidrug exporter                        | 2                        | Chr      |
| NODE_116_length_939_cov_35.117306  | transposase IS100                                     | 2                        | Hub*     |
| NODE_5_length_2581_cov_103.488617  | putative phage tail protein, transposase              | 6                        | Hub*     |
| NODE_145_length_559_cov_37.085239  | hypothetical protein, reverse transcriptase           | 2                        | Hub*     |

Hub\* : duplicated

Chr : assigned to chromosome

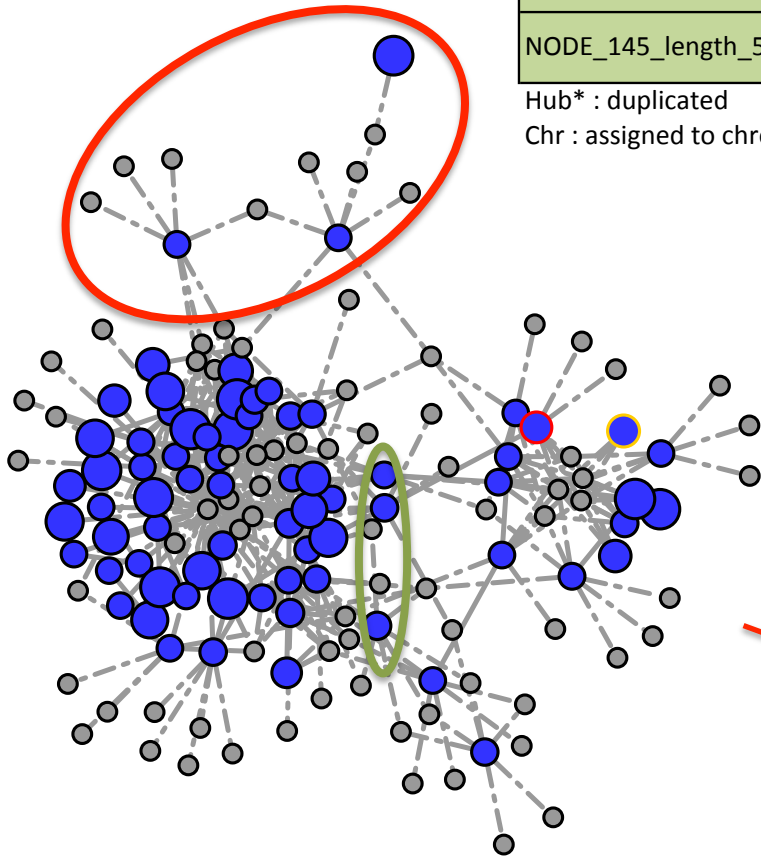

## STEP 3: Hub duplication and definition of p1 plasmid

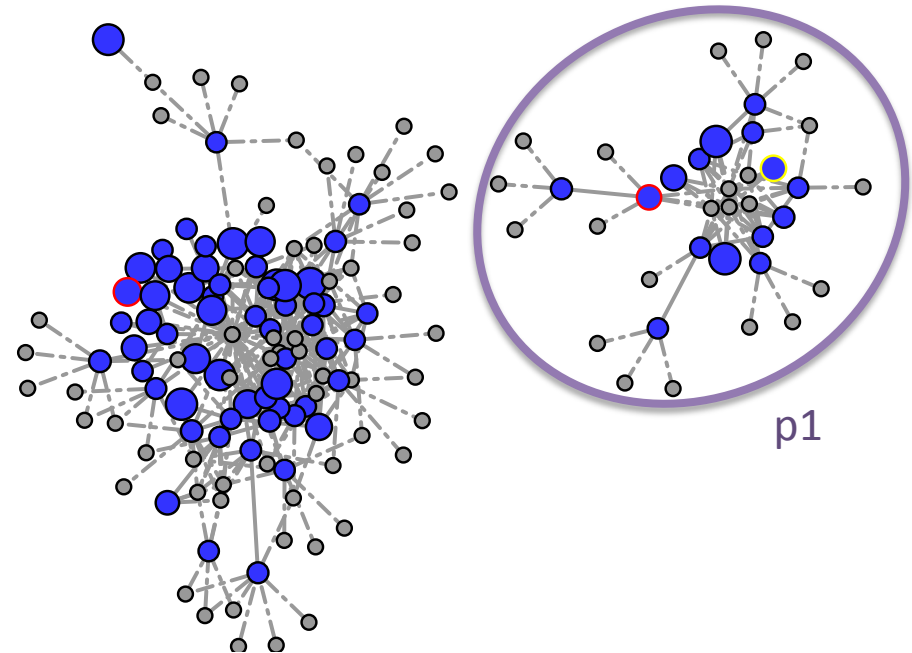

Supplement: pgen.1004766.s031.pdf [file pgen.1004766.s031.pdf]
