# Supplementary material for: Plasmid Flux in Escherichia coli ST131 Sublineages, Analyzed by Plasmid Constellation Network (PLACNET), a New Method for Plasmid Reconstruction from Whole Genome Sequences
Source: PubMed Central journal article supplement (PMC4270462; doi:10.1371/journal.pgen.1004766), 2014-12-18
Supplement: pgen.1004766.s033.pdf [file pgen.1004766.s033.pdf]

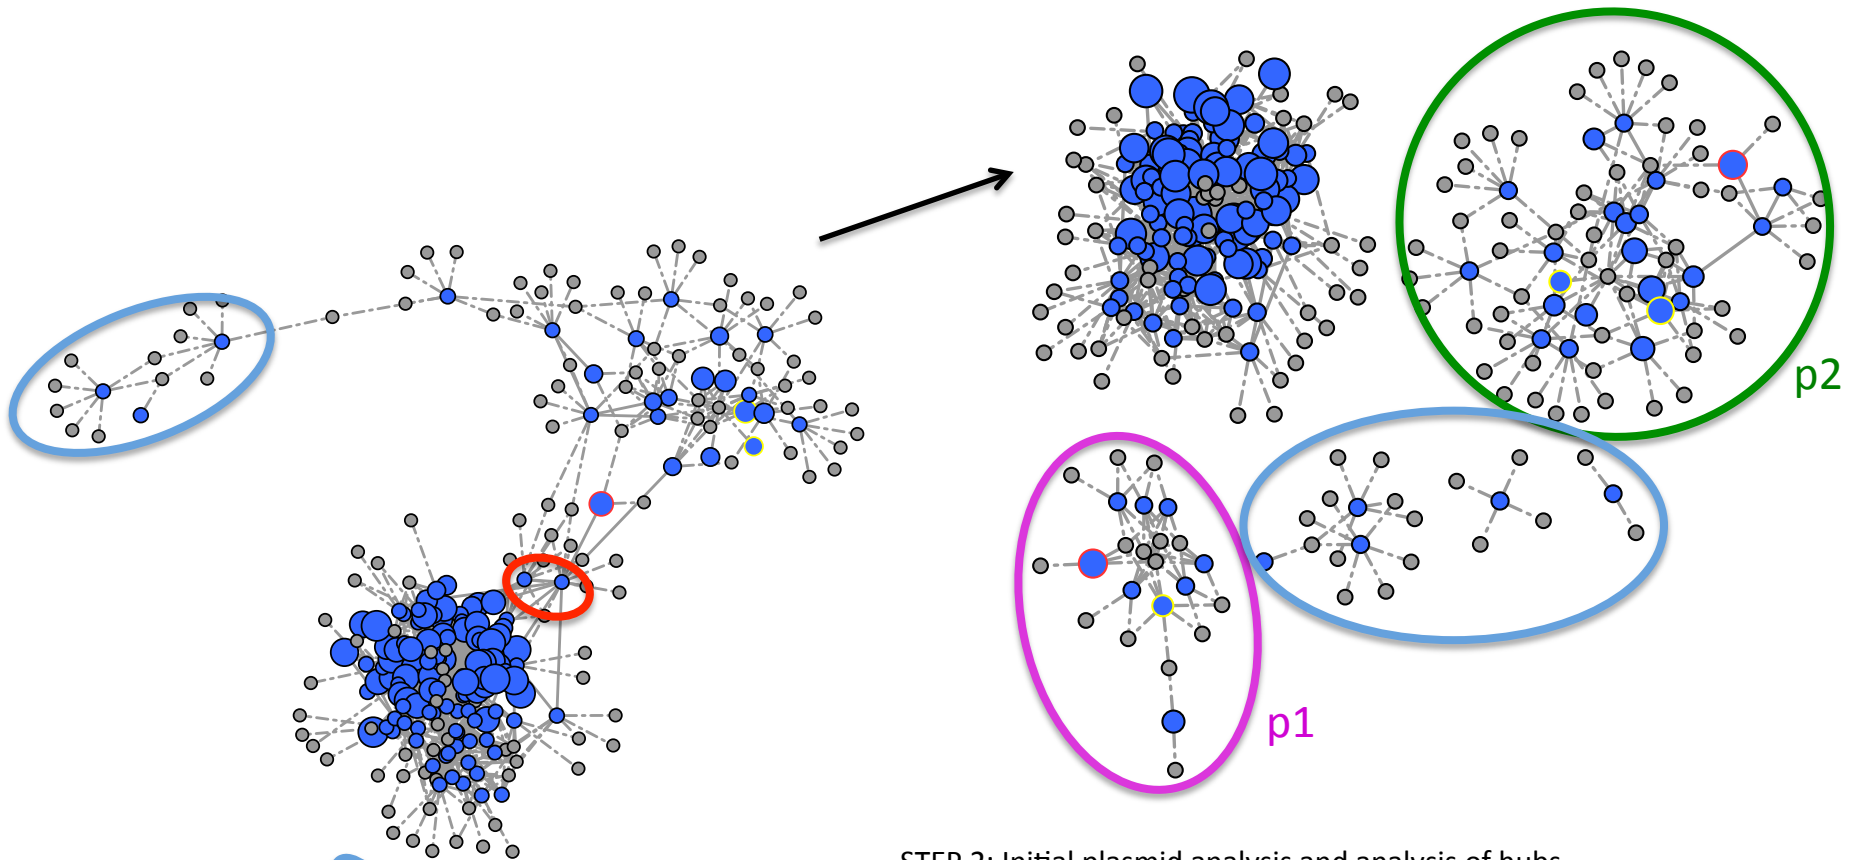

## STEP 2: Initial plasmid analysis and analysis of hubs

| Node (chr. 17x approx.)            | Blastn/Blastx                                                                                                       | Copy number (cov. based) | Decision   |
|------------------------------------|---------------------------------------------------------------------------------------------------------------------|--------------------------|------------|
| NODE_266_length_1007_cov_18.901621 | <i>tnpA</i> , <i>tetR</i> genes                                                                                     | 1                        | unassigned |
| NODE_283_length_397_cov_20.125944  | <i>bla<sub>OXA-2</sub></i> , integrase recombinase site, <i>qacED1</i> (partial)                                    | 1                        | unassigned |
| NODE_270_length_880_cov_43.992481  | partial class 1 integron: recombination site for <i>Int1</i> , <i>bla<sub>OXA-2</sub></i> , <i>aadA1</i> (partial)  | 2                        | unassigned |
| NODE_250_length_1065_cov_27.870804 | partial class 1 integron: <i>orf5</i> , <i>tnpA</i>                                                                 | 1                        | unassigned |
| NODE_276_length_1016_cov_23.614561 | partial class 1 integron: <i>bla<sub>OXA-2</sub></i> (partial), <i>aadA1</i> , <i>bla<sub>OXA-2</sub></i> (partial) | 1                        | unassigned |
| NODE_144_length_247_cov_202.624237 | <i>TnpA_IS1</i>                                                                                                     | 9                        | Hub*       |
| NODE_100_length_259_cov_204.949158 | <i>TnpA_IS1</i>                                                                                                     | 9                        | Hub*       |

Hub\* : duplicated
