# Supplementary material for: Plasmid Flux in Escherichia coli ST131 Sublineages, Analyzed by Plasmid Constellation Network (PLACNET), a New Method for Plasmid Reconstruction from Whole Genome Sequences
Source: PubMed Central journal article supplement (PMC4270462; doi:10.1371/journal.pgen.1004766), 2014-12-18
Supplement: pgen.1004766.s034.pdf [file pgen.1004766.s034.pdf]

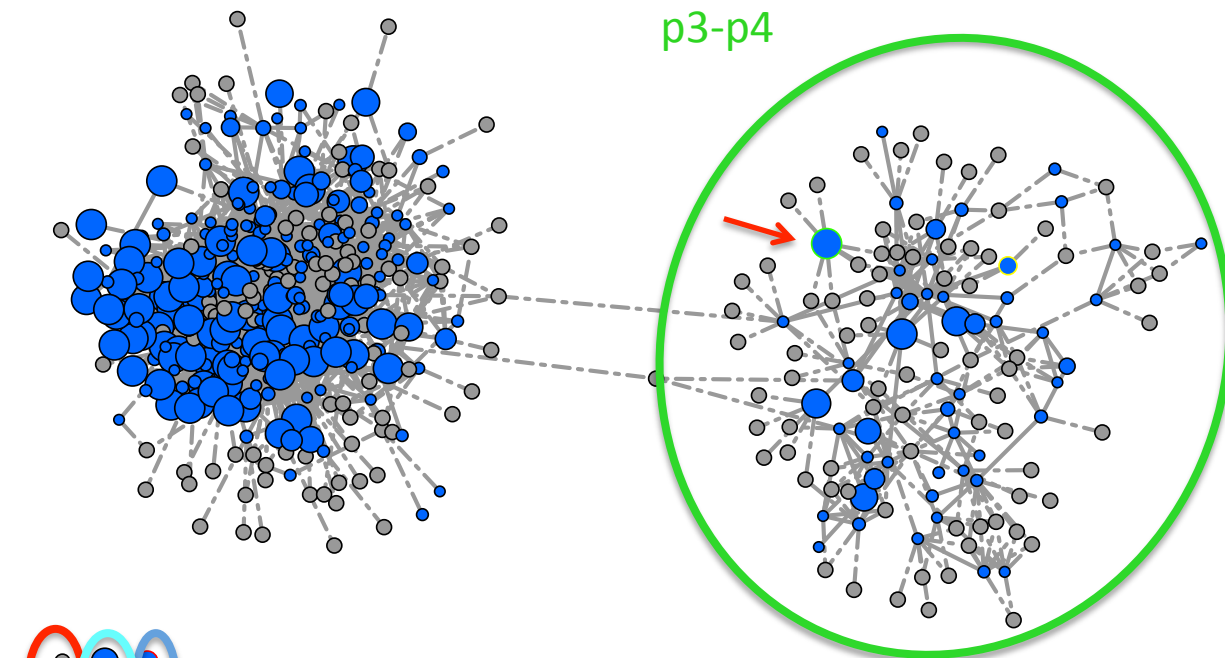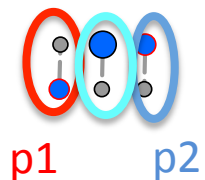

| Node (chr. 14X aprox.)              | Blastn/Blastx                                                                                                                      | Copy number (cov. Based) | Decision |
|-------------------------------------|------------------------------------------------------------------------------------------------------------------------------------|--------------------------|----------|
| NODE_547_length_5093_cov_143.617126 | replication protein, mob genes                                                                                                     | 10                       | p1       |
| NODE_548_length_5717_cov_143.144302 | replication protein, mob genes                                                                                                     | 10                       | p2       |
| NODE_250_length_8692_cov_13.472733  | several transposases, hypothetical proteins, copper binding protein, adhesin tibA and the tibA precursor.                          | 1                        | Chr      |
| NODE_229_length_9069_cov_12.583967  | putative terminator protein                                                                                                        | 1                        | Chr      |
| NODE_60_length_1232_cov_111.675323  | IS1414 transposase                                                                                                                 | 8                        | Hub*     |
| NODE_188_length_125_cov_199.679993  | hypothetical transposase                                                                                                           | 14                       | Hub*     |
| NODE_123_length_841_cov_218.697983  | putative transposase                                                                                                               | 16                       | Hub*     |
| NODE_69_length_552_cov_228.652176   | putative transposase                                                                                                               | 16                       | Hub*     |
| NODE_390_length_428_cov_54.207943   | putative transposase                                                                                                               | 4                        | Hub*     |
| NODE_266_length_508_cov_27.196850   | putative transposase                                                                                                               | 2                        | Hub*     |
| NODE_586_length_198_cov_86.535355   | IS629 transposase                                                                                                                  | 6                        | Hub*     |
| NODE_554_length_15758_cov_14.111690 | putative toxin-antitoxin system, hypothetical protein, replication protein, conserved hypothetical protein, finO, traX, tral, traD | 1                        | p3-p4    |

Hub\* : duplicated

Chr: assigned to chromosome
