# Supplementary material for: Plasmid Flux in Escherichia coli ST131 Sublineages, Analyzed by Plasmid Constellation Network (PLACNET), a New Method for Plasmid Reconstruction from Whole Genome Sequences
Source: PubMed Central journal article supplement (PMC4270462; doi:10.1371/journal.pgen.1004766), 2014-12-18
Supplement: pgen.1004766.s037.pdf [file pgen.1004766.s037.pdf]

**Table S2.** Ten *E. coli* genomes analyzed as examples of PLACNET performance <sup>1</sup>

| Genome <sup>2</sup>                 | Plasmid     | Accession no. | Estimated copy number | Coverage | N <sup>o</sup> contigs | Total bp  | N50 (bp) | Kmer | Longest contig (bp) |
|-------------------------------------|-------------|---------------|-----------------------|----------|------------------------|-----------|----------|------|---------------------|
| <b>JJ1886 (ST131, ExPEC)</b>        | pJJ1886_1   | NC_022661     | 20                    | 2000x    | 150                    | 5,211,142 | 237,023  | 79   | 710,527             |
|                                     | pJJ1886_2   | NC_022649     | 10                    | 1000x    |                        |           |          |      |                     |
|                                     | pJJ1886_3   | NC_022662     | 10                    | 1000x    |                        |           |          |      |                     |
|                                     | pJJ1886_4   | NC_022650     | 6                     | 600x     |                        |           |          |      |                     |
|                                     | pJJ1886_5   | NC_022651     | 1                     | 100x     |                        |           |          |      |                     |
|                                     | chromosome  | NC_022648     | 1                     | 100x     |                        |           |          |      |                     |
| <b>SE15 (ST131, ExPEC)</b>          | pECSF1      | NC_013655     | 1                     | 100x     | 91                     | 4,785,093 | 367,892  | 79   | 659,604             |
|                                     | chromosome  | NC_013654     | 1                     | 100x     |                        |           |          |      |                     |
| <b>UTI89 (ExPEC)</b>                | pUTI89      | NC_007941     | 1                     | 100x     | 124                    | 5,129,511 | 240,702  | 79   | 724,339             |
|                                     | chromosome  | NC_007946     | 1                     | 100x     |                        |           |          |      |                     |
| <b>SMS-3-5 (Environmental)</b>      | pSMS35_3    | NC_010487     | 50                    | 5000x    | 188                    | 5,169,770 | 200,074  | 83   | 377,480             |
|                                     | pSMS35_4    | NC_010486     | 50                    | 5000x    |                        |           |          |      |                     |
|                                     | pSMS35_8    | NC_010485     | 20                    | 2000x    |                        |           |          |      |                     |
|                                     | pSMS35_130  | NC_010488     | 1                     | 100x     |                        |           |          |      |                     |
|                                     | chromosome  | NC_010498     | 1                     | 100x     |                        |           |          |      |                     |
| <b>MG1655 + pEC_L46</b>             | pEC_L46     | NC_014385     | 1                     | 100x     | 146                    | 4,703,719 | 176,611  | 83   | 327,117             |
|                                     | chromosome  | NC_000913     | 1                     | 100x     |                        |           |          |      |                     |
| <b>MG1655 + pEC958 + R46</b>        | pEC958      | HG941719      | 1                     | 100x     | 171                    | 4,761,832 | 176,611  | 83   | 327,117             |
|                                     | R46         | NC_003292     | 1                     | 100x     |                        |           |          |      |                     |
|                                     | chromosome  | NC_000913.3   | 1                     | 100x     |                        |           |          |      |                     |
| <b>O157:H7 str. SS17 (EHEC)</b>     | pO157       | CP008807      | 1                     | 100x     | 556                    | 5,481,778 | 179,816  | 83   | 386,831             |
|                                     | pSS17       | CP008806      | 2                     | 100x     |                        |           |          |      |                     |
|                                     | chromosome  | CP008805      | 1                     | 100x     |                        |           |          |      |                     |
| <b>O145:H28 str. RM12581 (STEC)</b> | pRM12581    | CP007137      | 1                     | 100x     | 646                    | 5,497,629 | 137,834  | 79   | 264,117             |
|                                     | PO145-12581 | CP007138      | 1                     | 100x     |                        |           |          |      |                     |
|                                     | chromosome  | CP007138      | 1                     | 100x     |                        |           |          |      |                     |
| <b>O26:H11 str. 11368 (EHEC)</b>    | pO26_1      | NC_013369     | 1                     | 100x     | 707                    | 5,616,433 | 104,130  | 81   | 250,500             |
|                                     | pO26_2      | NC_013362     | 1                     | 100x     |                        |           |          |      |                     |
|                                     | pO26_3      | NC_013363     | 10                    | 1000x    |                        |           |          |      |                     |
|                                     | pO26_4      | NC_014543     | 10                    | 1000x    |                        |           |          |      |                     |
|                                     | chromosome  | NC_013361     | 1                     | 100x     |                        |           |          |      |                     |
| <b>H0407 (ETEC)</b>                 | p52         | NC_017721     | 10                    | 1000x    | 336                    | 5,205,705 | 87,499   | 83   | 248,902             |
|                                     | p58         | NC_017723     | 10                    | 1000x    |                        |           |          |      |                     |
|                                     | p666        | NC_017722     | 1                     | 100x     |                        |           |          |      |                     |
|                                     | p948        | NC_017724     | 1                     | 100x     |                        |           |          |      |                     |
|                                     | chromosome  | NC_017633     | 1                     | 100x     |                        |           |          |      |                     |

<sup>1</sup> The Table shows, for each genome, the accession number for each plasmid and chromosome, the estimated relative copy number of each plasmid, and some details of the simulated assembly of Illumina reads, as explained in the Method section.

<sup>2</sup> ExPEC: Extraintestinal pathogenic *Escherichia coli*, EHEC: Enterohemorrhagic *Escherichia coli*; STEC: Shiga toxin-producing *Escherichia coli*; ETEC: Enterotoxigenic *Escherichia coli*.
