# Supplementary material for: Plasmid Flux in Escherichia coli ST131 Sublineages, Analyzed by Plasmid Constellation Network (PLACNET), a New Method for Plasmid Reconstruction from Whole Genome Sequences
Source: PubMed Central journal article supplement (PMC4270462; doi:10.1371/journal.pgen.1004766), 2014-12-18
Supplement: pgen.1004766.s038.pdf [file pgen.1004766.s038.pdf]

**Table S3.** PLACNET performance on a set of ten *E. coli* genomes

| Genome <sup>1</sup>                             | Plasmid     | Accession no. | MOB group                                          | Inc group     | PLACNET size (bp) | NCBI size (bp) | Delta-size (% error) |
|-------------------------------------------------|-------------|---------------|----------------------------------------------------|---------------|-------------------|----------------|----------------------|
| <b>JJ1886 (ST131, ExPEC)</b>                    | pJJ1886_1   | NC_022661     | -                                                  | -             | 1,552             | 1,552          | 0 bp (0 %)           |
|                                                 | pJJ1886_2   | NC_022649     | MOB <sub>Q12</sub>                                 | -             | 5,167             | 5,167          | 0 bp (0 %)           |
|                                                 | pJJ1886_3   | NC_022662     | MOB <sub>PS1</sub>                                 | ColE1-like    | 5,601             | 5,631          | 30 bp (0.5 %)        |
|                                                 | pJJ1886_4   | NC_022650     | MOB <sub>P11</sub>                                 | IncP1         | 55,955            | 55,956         | 1 bp (0.002 %)       |
|                                                 | pJJ1886_5   | NC_022651     | MOB <sub>F12</sub>                                 | IncF          | 104,426           | 110,040        | 5,614 bp (5 %)       |
|                                                 | chromosome  | NC_022648     | -                                                  | -             | 5,038,008         | 5,129,938      | 91,930 bp (2 %)      |
| <b>UTI89 (ExPEC)</b>                            | pUTI89      | NC_007941     | MOB <sub>F12</sub>                                 | IncF          | 113,653           | 114,230        | 577 bp (0.5 %)       |
|                                                 | chromosome  | NC_007946     | -                                                  | -             | 5,033,656         | 5,065,741      | 32,085 bp (0.6 %)    |
| <b>SE15 (ST131, ExPEC)</b>                      | pEC5F1      | NC_013655     | MOB <sub>F12</sub>                                 | IncF          | 116,636           | 122,345        | 5,709 bp (5 %)       |
|                                                 | chromosome  | NC_013654     | -                                                  | -             | 4,666,391         | 4,717,338      | 50,947 bp (1 %)      |
| <b>SMS-3-5 (Environmental)</b>                  | pSMS35_3    | NC_010487     | -                                                  | -             | 3,496             | 3,565          | 69 bp (2 %)          |
|                                                 | pSMS35_4    | NC_010486     | MOB <sub>Qu</sub>                                  | -             | 3,981             | 4,074          | 93 bp (2 %)          |
|                                                 | pSMS35_8    | NC_010485     | MOB <sub>PS1</sub>                                 | ColE1-like    | 8,909             | 8,909          | 0 bp (0 %)           |
|                                                 | pSMS35_130  | NC_010488     | MOB <sub>F12</sub>                                 | IncF          | 122,954           | 130,440        | 7,486 bp (6 %)       |
|                                                 | chromosome  | NC_010498     | -                                                  | -             | 5,039,290         | 5,068,389      | 29,099 bp (1 %)      |
| <b>MG1655 + pEC_L46</b>                         | pEC_L46     | NC_014385     | MOB <sub>F11</sub> & MOB <sub>F12</sub>            | IncN & IncF   | 141,163           | 144,871        | 3,708 bp (3 %)       |
|                                                 | chromosome  | NC_000913     | -                                                  | -             | 4,582,408         | 4,641,652      | 59,244 bp (1 %)      |
| <b>MG1655 + pEC958 + R46</b>                    | pEC958      | HG941719      | MOB <sub>F12</sub>                                 | IncF          | 129,928           | 135,602        | 5,674 bp (4 %)       |
|                                                 | R46         | NC_003292     | MOB <sub>F11</sub>                                 | IncN          | 41,266            | 50,969         | 9,703 bp (19 %)      |
|                                                 | chromosome  | NC_000913     | -                                                  | -             | 4,581,208         | 4,641,652      | 60,444 bp (1 %)      |
| <b>O157:H7 str. SS17 (EHEC)<sup>2</sup></b>     | pO157       | CP008806      | MOB <sub>P12-like</sub> & ΔTral-MOB <sub>F12</sub> | IncF          | 92,025            | 94,645         | 2,620 bp (3 %)       |
|                                                 | pSS17       | CP008807      | MOB <sub>P6</sub>                                  | IncI2         | 37,122            | 37,447         | 325 bp (0.9 %)       |
|                                                 | chromosome  | CP008805      | -                                                  | -             | 5,293,573         | 5,523,849      | 230,276 bp (4 %)     |
| <b>O145:H28 str. RM12581 (STEC)<sup>3</sup></b> | pRM12581    | CP007137      | -                                                  | IncA/C        | 61,449            | 64,562         | 3,113 bp (5 %)       |
|                                                 | PO145-12581 | CP007138      | MOB <sub>P12</sub>                                 | IncB/O & IncF | 74,498            | 87,120         | 12,622 bp (15 %)     |
|                                                 | chromosome  | CP007138      | -                                                  | -             | 5,264,714         | 5,585,611      | 320,897 bp (6 %)     |
| <b>O26:H11 str. 11368 (EHEC)<sup>3</sup></b>    | pO26_1      | NC_013369     | MOB <sub>P12</sub>                                 | IncB/O & IncF | 74,108            | 85,167         | 11,059 bp (13 %)     |
|                                                 | pO26_2      | NC_013362     | MOB <sub>F12</sub>                                 | IncF          | 63,357            | 63,365         | 8 bp (0.01 %)        |
|                                                 | pO26_3      | NC_013363     | MOB <sub>PS1</sub>                                 | ColE1-like    | 5,031             | 5,686          | 655 bp (12 %)        |
|                                                 | pO26_4      | NC_014543     | -                                                  | -             | 3,690             | 4,073          | 383 bp (9 %)         |
|                                                 | chromosome  | NC_013361     | -                                                  | -             | 5,353,548         | 5,697,240      | 343,692 bp (6 %)     |
| <b>H0407 (ETEC)</b>                             | p52         | NC_017721     | MOB <sub>PS1</sub>                                 | ColE1-like    | 5,175             | 5,175          | 0 bp (0 %)           |
|                                                 | p58         | NC_017723     | MOB <sub>PS1</sub>                                 | ColE1-like    | 5,799             | 5,800          | 1 bp (0.02 %)        |
|                                                 | p666        | NC_017722     | MOB <sub>F12</sub>                                 | IncF          | 118,831           | 66,681         | -                    |
|                                                 | p948        | NC_017724     | -                                                  | IncF          | 94,797            | 94,797         | -                    |
|                                                 | chromosome  | NC_017633     | -                                                  | -             | 5,070,175         | 5,153,435      | 83,260 bp (1.6 %)    |

<sup>1</sup>ExPEC: Extraintestinal pathogenic Escherichia coli, EHEC: Enterohemorrhagic Escherichia coli; STEC: Shiga toxin-producing Escherichia coli; ETEC: Enterotoxigenic Escherichia coli. <sup>2</sup>In these genomes contigs <350 bp were removed. <sup>3</sup>In this genome contigs <500 bp were removed.
