# Supplementary material for: Plasmid Flux in Escherichia coli ST131 Sublineages, Analyzed by Plasmid Constellation Network (PLACNET), a New Method for Plasmid Reconstruction from Whole Genome Sequences
Source: PubMed Central journal article supplement (PMC4270462; doi:10.1371/journal.pgen.1004766), 2014-12-18
Supplement: pgen.1004766.s039.pdf [file pgen.1004766.s039.pdf]

**Table S4.** Molecular size of the plasmids estimated by S1-PFGE and PLACNET reconstruction in the four strains sequenced in this study.

| Strain | S1-PFGE (kb)    | PLACNET (kb)       |
|--------|-----------------|--------------------|
| FV9873 | 80-90; 30       | 91, 33             |
| E35BA  | 140; 75         | 211 (plasmids 1+2) |
| E2022  | 100; 95; 35-40  | 103; 98; 35        |
| E61BA  | 140; 25; 20; 15 | 137; 37; 24; 18    |
